# Supplementary material
Source: publisher figshare collection journal article supplement (https://gsajournals.figshare.com/ndownloader/files/26579582)
Supplement: Supplementary file 1 [file 26579582]

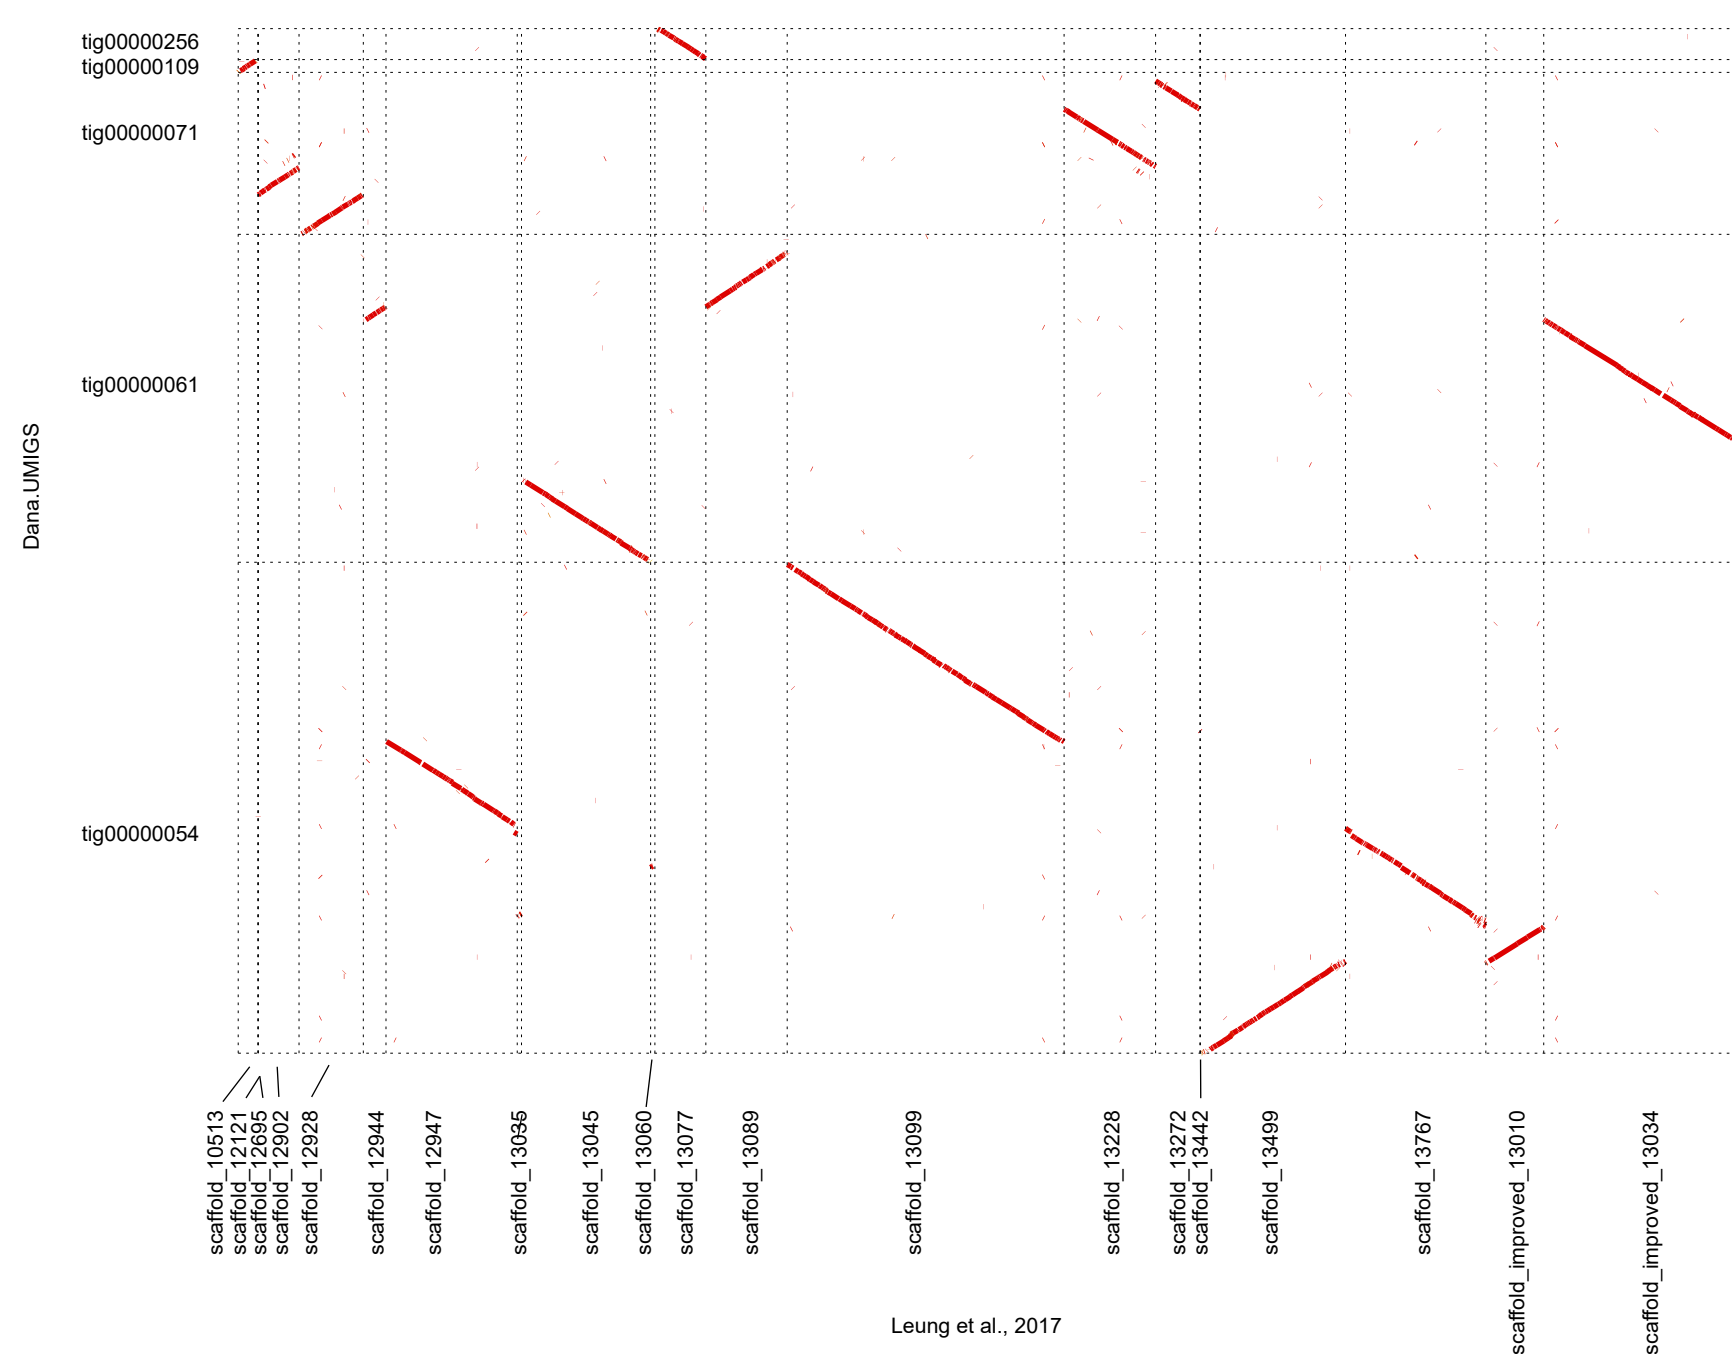

**Figure S8. Identification of chromosome 4 contigs in the Dana.UMIGS assembly.**

Contigs from the Dana.UMIGS assembly were aligned to 20 scaffold sequences from a previously assembled *D. ananassae* genome that were assigned to chromosome 4 (Leung et al. 2017) using NUCmer and visualized using mummerplot. Following manual inspection and removal of spurious alignments, the final set of contigs corresponding to chromosome 4 were re-aligned and visualized.
